# Supplementary material for: Optimal Fertilization Level for Yield, Biological and Quality Traits of Soybean under Drip Irrigation System in the Arid Region of Northwest China
Source: MDPI journal article supplement (doi:10.3390/agronomy12020291), 2022-01-24
Supplement: s1 [file s1]

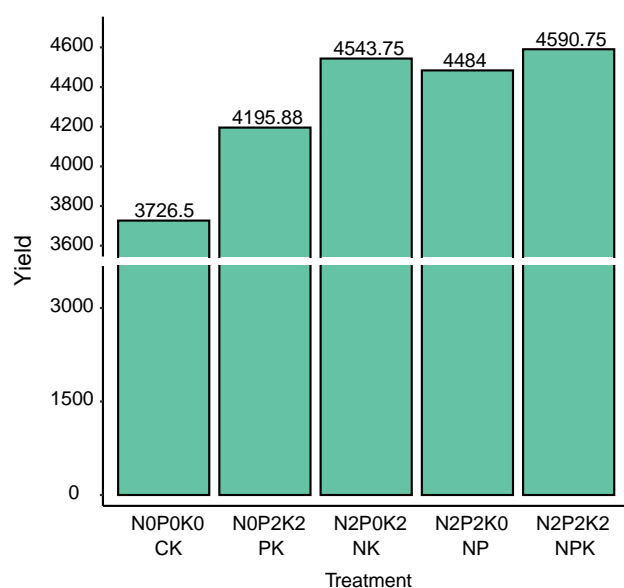

**Figure S1.** Grain yield of Zhonghuang 35 based on the different treatment combinations.

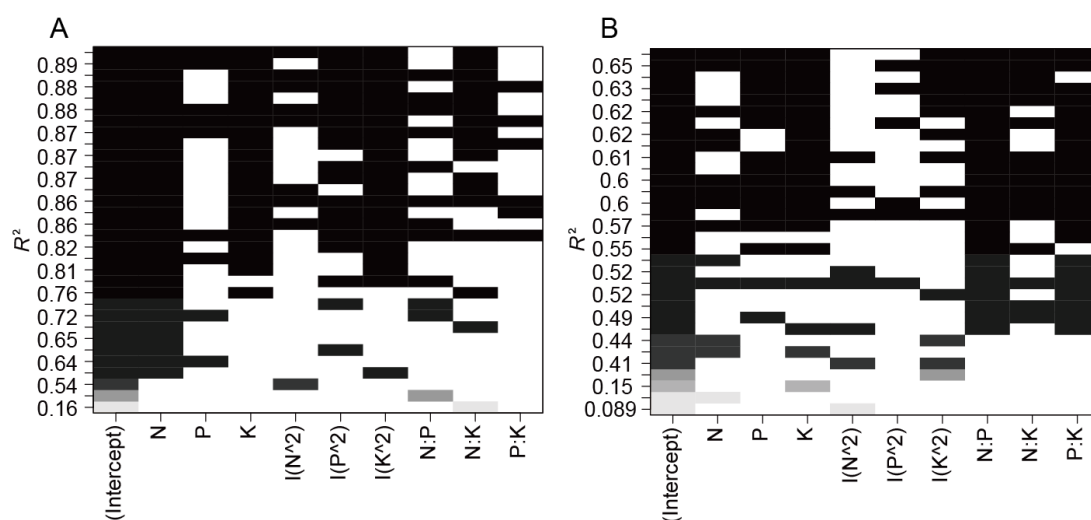

**Figure S2.** The adjusted  $r^2$  on the quadratic polynomial regression model with different components for grain yield (A) and plant biomass (B), the number on the left means  $r^2$  of the model with the component colored in “black” for each row.
